# Supplementary material
Source: ML conference proceedings conference paper supplement (https://proceedings.mlr.press/v216/zhao23a.html)
Supplement: Supplementary file 1 [file zhao23a-supp.pdf]

---

# Conditional Counterfactual Causal Effect for Individual Attribution (Supplementary Material)

---

Ruiqi Zhao<sup>1</sup>   Lei Zhang<sup>2</sup>   Shengyu Zhu<sup>3</sup>   Zitong Lu<sup>4</sup>   Zhenhua Dong<sup>3</sup>   Chaoliang Zhang<sup>3</sup>   Jun Xu<sup>2</sup>  
Zhi Geng<sup>5</sup>   Yangbo He<sup>\*1</sup>

<sup>1</sup>School of Mathematical Sciences, Peking University   <sup>2</sup>Renmin University of China  
<sup>3</sup>Huawei Noah's Ark Lab   <sup>4</sup>City University of Hong Kong  
<sup>5</sup>School of Mathematics and Statistics, Beijing Technology and Business University

## A PROOF OF LEMMA 1

We can write the conditional probability as

$$P\left(Y_{\mathbf{x}_S^0} = 1 \mid \mathbf{X} = \mathbf{x}\right) = \frac{P\left(Y_{\mathbf{x}_S^0} = 1, \mathbf{X} = \mathbf{x}\right)}{P\left(\mathbf{X} = \mathbf{x}\right)}.$$

We first show the identifiability of the numerator.

$$\begin{aligned} & P\left(Y_{\mathbf{x}_S^0} = 1, \mathbf{X} = \mathbf{x}\right) \\ &= P\left(Y_{\mathbf{x}_S^0} = 1, \mathbf{A}_k = \mathbf{a}_k, X_k = x_k, \mathbf{D}_{k+1} = \mathbf{d}_{k+1}\right) \\ &= \sum_{c_k \leq x_k} P\left(Y_{\mathbf{x}_S^0} = 1, \mathbf{A}_k = \mathbf{a}_k, (X_k)_{\mathbf{a}_k} = x_k, (X_k)_{\mathbf{a}_k, \mathbf{x}_S^0} = c_k, \mathbf{D}_{k+1} = \mathbf{d}_{k+1}\right) \\ &= \sum_{c_k \leq x_k} P\left(Y_{\mathbf{x}_S^0} = 1, \mathbf{A}_k = \mathbf{a}_k, C_k = c_k, \mathbf{D}_{k+1} = \mathbf{d}_{k+1}\right) \\ &= \sum_{(c_k, c_{k+1}) \preceq (x_k, x_{k+1})} P\left(Y_{\mathbf{x}_S^0} = 1, \mathbf{A}_k = \mathbf{a}_k, C_k = c_k, (X_{k+1})_{\mathbf{a}_{k+1}} = x_{k+1}, \right. \\ &\quad \left. (X_{k+1})_{\mathbf{a}_k, c_k, \mathbf{x}_S^0} = c_{k+1}, \mathbf{D}_{k+2} = \mathbf{d}_{k+2}\right) \\ &= \sum_{\mathbf{c}_{k:k+1} \preceq \mathbf{x}_{k:k+1}} P\left(Y_{\mathbf{x}_S^0} = 1, \mathbf{A}_k = \mathbf{a}_k, C_k = c_k, C_{k+1} = c_{k+1}, \mathbf{D}_{k+2} = \mathbf{d}_{k+2}\right), \end{aligned}$$

where for ease of presentation we use  $C_l = c_l$  to denote  $((X_l)_{\mathbf{a}_l}, (X_l)_{\mathbf{a}_k, c_k, l-1, \mathbf{x}_S^0}) = (x_l, c_l)$  for  $k \leq l \leq p$  and  $x_l \geq c_l$ , and  $c_l = x_l^0$  if  $l \in \mathbf{S}$ . The second equality holds because of the consistency and the monotonicity assumptions.

---

\*Correspondence to heyb@math.pku.edu.cn

Recursively, by the consistency and the composition, we have

$$\begin{aligned}
& \mathbb{P}\left(Y_{\mathbf{x}_S^0} = 1, \mathbf{X} = \mathbf{x}\right) \\
&= \mathbb{P}\left(Y_{\mathbf{x}_S^0} = 1, \mathbf{A}_k = \mathbf{a}_k, \mathbf{D}_k = \mathbf{d}_k\right) \\
&= \sum_{\mathbf{c}_{k:p} \preceq \mathbf{d}_k} \mathbb{P}\left(Y_{\mathbf{x}_S^0} = 1, \mathbf{A}_k = \mathbf{a}_k, C_k = c_k, \dots, C_p = c_p\right) \\
&= \sum_{\mathbf{c}_{k:p} \preceq \mathbf{d}_k} \mathbb{P}\left(Y_{\mathbf{a}_k, \mathbf{c}_{k:p}} = 1, \mathbf{A}_k = \mathbf{a}_k, C_k = c_k, \dots, C_p = c_p\right) \\
&= \sum_{\mathbf{c}_{k:p} \preceq \mathbf{d}_k} \mathbb{P}\left(Y_{\mathbf{a}_k, \mathbf{c}_{k:p}} = 1, C_k = c_k, \dots, C_p = c_p \mid \mathbf{A}_k = \mathbf{a}_k\right) \times \mathbb{P}(\mathbf{A}_k = \mathbf{a}_k), \\
&= \sum_{\mathbf{c}_{k:p} \preceq \mathbf{d}_k} \mathbb{P}\left(Y_{\mathbf{a}_k, \mathbf{c}_{k:p}} = 1 \mid \mathbf{A}_k = \mathbf{a}_k\right) \times \prod_{l=k}^p \mathbb{P}(C_l = c_l \mid \mathbf{A}_k = \mathbf{a}_k) \times \mathbb{P}(\mathbf{A}_k = \mathbf{a}_k),
\end{aligned}$$

where the last equality holds as the potential outcomes  $\mathbf{C}_{k:p} = (C_k, \dots, C_p)$  are conditionally independent given  $\mathbf{A}_k$ . By the no confounding assumption, the first factor can be identified by

$$\mathbb{P}\left(Y_{\mathbf{a}_k, \mathbf{c}_{k:p}} = 1 \mid \mathbf{A}_k = \mathbf{a}_k\right) = \mathbb{P}(Y = 1 \mid \mathbf{A}_k = \mathbf{a}_k, X_k = c_k, \dots, X_p = c_p).$$

Next, we consider the identifiability of  $\mathbb{P}(C_l = c_l \mid \mathbf{A}_k = \mathbf{a}_k)$  for  $l = k + 1, \dots, p$ . For  $l \in \mathbf{S}$ , we have

$$\begin{aligned}
& \mathbb{P}(C_l = c_l \mid \mathbf{A}_k = \mathbf{a}_k) \\
&= \mathbb{P}\left((X_l)_{\mathbf{a}_l} = x_l, (X_l)_{\mathbf{a}_k, \mathbf{c}_{k:l-1}, \mathbf{x}_S^1} = c_l \mid \mathbf{A}_k = \mathbf{a}_k\right) \\
&= \mathbb{1}_{c_l = x_l} \cdot \mathbb{P}\left((X_l)_{\mathbf{a}_l} = x_l, (X_l)_{\mathbf{a}_k, \mathbf{c}_{k:l-1}, x_l^1} = x_l^1 \mid \mathbf{A}_k = \mathbf{a}_k\right) \\
&= \mathbb{1}_{c_l = x_l} \cdot \mathbb{P}\left((X_l)_{\mathbf{a}_l} = x_l \mid \mathbf{A}_k = \mathbf{a}_k\right) \\
&= \mathbb{1}_{c_l = x_l} \cdot \mathbb{P}(X_l = x_l \mid \mathbf{A}_k = \mathbf{a}_k),
\end{aligned}$$

where the second equality holds by the definition of  $c_l$  and the third equality holds by the consistency.

For  $l \notin \mathbf{S}$ , we have the following three cases according to the values of  $(x_l, c_l)$ :

- $(x_l, c_l) = (0, 0)$ : for this case, we have

$$\begin{aligned}
& \mathbb{P}(C_l = c_l \mid \mathbf{A}_k = \mathbf{a}_k) \\
&= \mathbb{P}\left((X_l)_{\mathbf{a}_l} = 0, (X_l)_{\mathbf{a}_k, \mathbf{c}_{k:l-1}, \mathbf{x}_S^0} = 0 \mid \mathbf{A}_k = \mathbf{a}_k\right) \\
&= \mathbb{P}\left((X_l)_{\mathbf{a}_l} = 0 \mid \mathbf{A}_k = \mathbf{a}_k\right) \\
&= \mathbb{P}(X_l = 0 \mid \mathbf{A}_l = \mathbf{a}_l),
\end{aligned}$$

where the second and the third equalities hold because of the monotonicity and no confounding assumptions, respectively;

- For the case of  $(x_l, c_l) = (1, 1)$ , we have

$$\begin{aligned}
& \mathbb{P}(C_l = c_l \mid \mathbf{A}_k = \mathbf{a}_k) \\
&= \mathbb{P}\left((X_l)_{\mathbf{a}_l} = 1, (X_l)_{\mathbf{a}_k, \mathbf{c}_{k:l-1}, \mathbf{x}_S^0} = 1 \mid \mathbf{A}_k = \mathbf{a}_k\right) \\
&= \mathbb{P}\left((X_l)_{\mathbf{a}_k, \mathbf{c}_{k:l-1}, \mathbf{x}_S^0} = 1 \mid \mathbf{A}_k = \mathbf{a}_k\right) \\
&= \mathbb{P}(X_l = 1 \mid \mathbf{A}_k = \mathbf{a}_k, \mathbf{X}_{k:l-1} = \mathbf{c}_{k+l-1});
\end{aligned}$$

- For the case of  $(x_l, c_l) = (1, 0)$ , we have

$$\begin{aligned}
& \mathbb{P}(C_l = c_l \mid \mathbf{A}_k = \mathbf{a}_k) \\
&= \mathbb{P}\left((X_l)_{\mathbf{a}_l} = 1, (X_l)_{\mathbf{a}_k, \mathbf{c}_{k:l-1}, \mathbf{x}_S^0} = 0 \mid \mathbf{A}_k = \mathbf{a}_k\right) \\
&= \mathbb{P}\left((X_l)_{\mathbf{a}_l} = 1 \mid \mathbf{A}_k = \mathbf{a}_k\right) - \mathbb{P}\left((X_l)_{\mathbf{a}_l} = 1, (X_l)_{\mathbf{a}_k, \mathbf{c}_{k:l-1}, \mathbf{x}_S^0} = 1 \mid \mathbf{A}_k = \mathbf{a}_k\right) \\
&= \mathbb{P}(X_l = 1 \mid \mathbf{A}_l = \mathbf{a}_l) - \mathbb{P}(X_l = 1 \mid \mathbf{A}_k = \mathbf{a}_k, \mathbf{X}_{k:l-1} = \mathbf{c}_{k+l-1}).
\end{aligned}$$

Summarizing the identification equations for the three cases, we get

$$\begin{aligned}
& \prod_{l=k}^p \mathbb{P}(C_l = c_l \mid \mathbf{A}_k = \mathbf{a}_k) \\
&= \prod_{i \in \{k, \dots, p\} \setminus \mathbf{S}} \left\{ (1 - x_i) \times \mathbb{P}(X_i = 0 \mid \mathbf{A}_i = \mathbf{a}_i) + x_i(1 - c_i) \times \mathbb{P}(X_i = 1 \mid \mathbf{A}_i = \mathbf{a}_i) \right. \\
&\quad \left. + x_i(-1)^{1-c_i} \times \mathbb{P}(X_i = 1 \mid \mathbf{A}_k = \mathbf{a}_k, \mathbf{X}_{k:i-1} = \mathbf{c}_{k:i-1}) \right\} \times \prod_{i \in \mathbf{S}} \mathbb{P}(X_i = x_i \mid \mathbf{A}_i = \mathbf{a}_i) \\
&\quad \times \mathbf{1}_{\mathbf{x}_S = \mathbf{c}_S}.
\end{aligned}$$

From the above results, the identification formula of  $\mathbb{P}(Y_{\mathbf{x}_S^0} = 1 \mid \mathbf{X} = \mathbf{x})$  can be derived as follows

$$\begin{aligned}
& \mathbb{P}(Y_{\mathbf{x}_S^0} = 1 \mid \mathbf{X} = \mathbf{x}) = \frac{\mathbb{P}(Y_{\mathbf{x}_S^0} = 1, \mathbf{X} = \mathbf{x})}{\mathbb{P}(\mathbf{X} = \mathbf{x})} \\
&= \sum_{\mathbf{c}_{k:p} \preceq \mathbf{d}_k} \left[ \frac{\mathbb{P}(Y_{\mathbf{a}_k, \mathbf{c}_{k:p}} = 1 \mid \mathbf{A}_k = \mathbf{a}_k)}{\mathbb{P}(\mathbf{D}_k = \mathbf{d}_k \mid \mathbf{A}_k = \mathbf{a}_k)} \times \prod_{l=k}^p \mathbb{P}(C_l = c_l \mid \mathbf{A}_k = \mathbf{a}_k) \right] \\
&= \sum_{\mathbf{c}_{k:p} \preceq \mathbf{d}_k} \left\{ \mathbf{1}_{\mathbf{x}_S = \mathbf{c}_S} \times \frac{\mathbb{P}(Y = 1 \mid \mathbf{A}_k = \mathbf{a}_k, \mathbf{D}_k = \mathbf{c}_{k:p})}{\mathbb{P}(\mathbf{D}_k = \mathbf{d}_k \mid \mathbf{A}_k = \mathbf{a}_k)} \times \prod_{i \in \mathbf{S}} \mathbb{P}(X_i = x_i \mid \mathbf{A}_i = \mathbf{a}_i) \right. \\
&\quad \times \prod_{i \in \{k, \dots, p\} \setminus \mathbf{S}} \left[ (1 - x_i) \times \mathbb{P}(X_i = 0 \mid \mathbf{A}_i = \mathbf{a}_i) + x_i(1 - c_i) \times \mathbb{P}(X_i = 1 \mid \mathbf{A}_i = \mathbf{a}_i) \right. \\
&\quad \left. \left. + x_i(-1)^{1-c_i} \times \mathbb{P}(X_i = 1 \mid \mathbf{A}_k = \mathbf{a}_k, \mathbf{X}_{k:i-1} = \mathbf{c}_{k:i-1}) \right] \right\} \\
&= \sum_{\mathbf{c}_{k:p} \preceq \mathbf{d}_k} \left\{ \mathbf{1}_{\mathbf{x}_S = \mathbf{c}_S} \times \mathbb{P}(Y = 1 \mid \mathbf{A}_k = \mathbf{a}_k, \mathbf{D}_k = \mathbf{c}_{k:p}) \right. \\
&\quad \left. \times \prod_{i \in \{k, \dots, p\} \setminus \mathbf{S}} \left[ 1 - x_i c_i + x_i(-1)^{1-c_i} \times \frac{\mathbb{P}(X_i = 1 \mid \mathbf{A}_k = \mathbf{a}_k, \mathbf{X}_{k:i-1} = \mathbf{c}_{k:i-1})}{\mathbb{P}(X_i = x_i \mid \mathbf{A}_i = \mathbf{a}_i)} \right] \right\},
\end{aligned}$$

where the last equality holds because

$$(1 - x_i) \times \frac{\mathbb{P}(X_i = 0 \mid \mathbf{A}_i = \mathbf{a}_i)}{\mathbb{P}(X_i = x_i \mid \mathbf{A}_i = \mathbf{a}_i)} = \begin{cases} 0, & \text{if } x_i = 1; \\ 1 - x_i, & \text{if } x_i = 0; \end{cases}$$

and

$$x_i(1 - c_i) \times \frac{\mathbb{P}(X_i = 1 \mid \mathbf{A}_i = \mathbf{a}_i)}{\mathbb{P}(X_i = x_i \mid \mathbf{A}_i = \mathbf{a}_i)} = \begin{cases} x_i(1 - c_i), & \text{if } x_i = 1; \\ 0, & \text{if } x_i = 0. \end{cases}$$

## B PROOF OF LEMMA 2

We write the conditional probability as

$$\mathbb{P}(Y_{\mathbf{x}_S^1} = 1 \mid \mathbf{X} = \mathbf{x}) = \frac{\mathbb{P}(Y_{\mathbf{x}_S^1} = 1, \mathbf{X} = \mathbf{x})}{\mathbb{P}(\mathbf{X} = \mathbf{x})},$$

and we first show the identifiability of the numerator above.

$$\begin{aligned}
& \mathbb{P}\left(Y_{\mathbf{x}_S^1} = 1, \mathbf{X} = \mathbf{x}\right) \\
&= \mathbb{P}\left(Y_{\mathbf{x}_S^1} = 1, \mathbf{A}_k = \mathbf{a}_k, X_k = x_k, \mathbf{D}_{k+1} = \mathbf{d}_{k+1}\right) \\
&= \sum_{c_k \geq x_k} \mathbb{P}\left(Y_{\mathbf{x}_S^1} = 1, \mathbf{A}_k = \mathbf{a}_k, (X_k)_{\mathbf{a}_k} = x_k, (X_k)_{\mathbf{a}_k, \mathbf{x}_S^1} = c_k, \mathbf{D}_{k+1} = \mathbf{d}_{k+1}\right) \\
&= \sum_{c_k \geq x_k} \mathbb{P}\left(Y_{\mathbf{x}_S^1} = 1, \mathbf{A}_k = \mathbf{a}_k, C_k = c_k, \mathbf{D}_{k+1} = \mathbf{d}_{k+1}\right) \\
&= \sum_{(c_k, c_{k+1}) \succeq (x_k, x_{k+1})} \mathbb{P}\left(Y_{\mathbf{x}_S^1} = 1, \mathbf{A}_k = \mathbf{a}_k, C_k = c_k, (X_{k+1})_{\mathbf{a}_{k+1}} = x_{k+1}, \right. \\
&\quad \left. (X_{k+1})_{\mathbf{a}_k, c_k, \mathbf{x}_S^1} = c_{k+1}, \mathbf{D}_{k+2} = \mathbf{d}_{k+2}\right) \\
&= \sum_{\mathbf{c}_{k:k+1} \succeq \mathbf{x}_{k:k+1}} \mathbb{P}\left(Y_{\mathbf{x}_S^1} = 1, \mathbf{A}_k = \mathbf{a}_k, C_k = c_k, C_{k+1} = c_{k+1}, \mathbf{D}_{k+2} = \mathbf{d}_{k+2}\right),
\end{aligned}$$

where  $C_l = c_l$  denotes  $((X_l)_{\mathbf{a}_l}, (X_l)_{\mathbf{a}_k, \mathbf{c}_{k:l-1}, \mathbf{x}_S^1}) = (x_l, c_l)$  for any  $k \leq l \leq p$  satisfying  $x_l \leq c_l$  and  $c_l = x_l^1$  if  $l \in \mathbf{S}$ . The second equality holds because of the consistency and Assumption 2(a).

Recursively, by the consistency and the composition, we have

$$\begin{aligned}
& \mathbb{P}\left(Y_{\mathbf{x}_S^1} = 1, \mathbf{X} = \mathbf{x}\right) \\
&= \mathbb{P}\left(Y_{\mathbf{x}_S^1} = 1, \mathbf{A}_k = \mathbf{a}_k, \mathbf{D}_k = \mathbf{d}_k\right) \\
&= \sum_{\mathbf{c}_{k:p} \succeq \mathbf{d}_k} \mathbb{P}\left(Y_{\mathbf{x}_S^1} = 1, \mathbf{A}_k = \mathbf{a}_k, C_k = c_k, \dots, C_p = c_p\right) \\
&= \sum_{\mathbf{c}_{k:p} \succeq \mathbf{d}_k} \mathbb{P}\left(Y_{\mathbf{a}_k, \mathbf{c}_{k:p}} = 1, \mathbf{A}_k = \mathbf{a}_k, C_k = c_k, \dots, C_p = c_p\right) \\
&= \sum_{\mathbf{c}_{k:p} \succeq \mathbf{d}_k} \mathbb{P}\left(Y_{\mathbf{a}_k, \mathbf{c}_{k:p}} = 1, C_k = c_k, \dots, C_p = c_p \mid \mathbf{A}_k = \mathbf{a}_k\right) \times \mathbb{P}\left(\mathbf{A}_k = \mathbf{a}_k\right), \\
&= \sum_{\mathbf{c}_{k:p} \succeq \mathbf{d}_k} \mathbb{P}\left(Y_{\mathbf{a}_k, \mathbf{c}_{k:p}} = 1 \mid \mathbf{A}_k = \mathbf{a}_k\right) \times \prod_{l=k}^p \mathbb{P}\left(C_l = c_l \mid \mathbf{A}_k = \mathbf{a}_k\right) \times \mathbb{P}\left(\mathbf{A}_k = \mathbf{a}_k\right),
\end{aligned}$$

where the last equality holds because of the conditional independencies between the potential outcomes  $\mathbf{C}_{k:p} = (C_k, \dots, C_p)$  given  $\mathbf{A}_k$ . By the no confounding assumption, the first factor above can be identified by

$$\begin{aligned}
& \mathbb{P}\left(Y_{\mathbf{a}_k, \mathbf{c}_{k:p}} = 1 \mid \mathbf{A}_k = \mathbf{a}_k\right) \\
&= \mathbb{P}\left(Y = 1 \mid \mathbf{A}_k = \mathbf{a}_k, X_k = c_k, \dots, X_p = c_p\right).
\end{aligned}$$

Next, we consider the identifiability of  $\mathbb{P}(C_l = c_l \mid \mathbf{A}_k = \mathbf{a}_k)$  for  $l = k+1, \dots, p$ .

For  $l \in \mathbf{S}$ , we have

$$\begin{aligned}
& \mathbb{P}\left(C_l = c_l \mid \mathbf{A}_k = \mathbf{a}_k\right) \\
&= \mathbb{P}\left((X_l)_{\mathbf{a}_l} = x_l, (X_l)_{\mathbf{a}_k, \mathbf{c}_{k:l-1}, \mathbf{x}_S^1} = c_l \mid \mathbf{A}_k = \mathbf{a}_k\right) \\
&= \mathbb{1}_{c_l = x_l} \cdot \mathbb{P}\left((X_l)_{\mathbf{a}_l} = x_l, (X_l)_{\mathbf{a}_k, \mathbf{c}_{k:l-1}, x_l^1} = x_l^1 \mid \mathbf{A}_k = \mathbf{a}_k\right) \\
&= \mathbb{1}_{c_l = x_l} \cdot \mathbb{P}\left((X_l)_{\mathbf{a}_l} = x_l \mid \mathbf{A}_k = \mathbf{a}_k\right) \\
&= \mathbb{1}_{c_l = x_l} \cdot \mathbb{P}\left(X_l = x_l \mid \mathbf{A}_k = \mathbf{a}_k\right),
\end{aligned}$$

where the second equality holds by the definition of  $c_l$  and the third equality holds by the consistency.

For  $l \notin \mathbf{S}$ , according to the value of  $(x_l, c_l)$  we discuss it for three cases.

- For the case of  $(x_l, c_l) = (0, 0)$ , we have

$$\begin{aligned}
& \mathbb{P}(C_l = c_l \mid \mathbf{A}_k = \mathbf{a}_k) \\
&= \mathbb{P}\left((X_l)_{\mathbf{a}_l} = 0, (X_l)_{\mathbf{a}_k, \mathbf{c}_{k:l-1}, \mathbf{x}_S^1} = 0 \mid \mathbf{A}_k = \mathbf{a}_k\right) \\
&= \mathbb{P}\left((X_l)_{\mathbf{a}_k, \mathbf{c}_{k:l-1}, \mathbf{x}_S^1} = 0 \mid \mathbf{A}_k = \mathbf{a}_k\right) \\
&= \mathbb{P}(X_l = 0 \mid \mathbf{A}_k = \mathbf{a}_k, \mathbf{X}_{k:l-1} = \mathbf{c}_{k:l-1}),
\end{aligned}$$

where the second and the third equalities hold because of the monotonicity and no confounding assumptions, respectively;

- For the case of  $(x_l, c_l) = (1, 1)$ , we have

$$\begin{aligned}
& \mathbb{P}(C_l = c_l \mid \mathbf{A}_k = \mathbf{a}_k) \\
&= \mathbb{P}\left((X_l)_{\mathbf{a}_l} = 1, (X_l)_{\mathbf{a}_k, \mathbf{c}_{k:l-1}, \mathbf{x}_S^1} = 1 \mid \mathbf{A}_k = \mathbf{a}_k\right) \\
&= \mathbb{P}\left((X_l)_{\mathbf{a}_l} = 1 \mid \mathbf{A}_k = \mathbf{a}_k\right) \\
&= \mathbb{P}(X_l = 1 \mid \mathbf{A}_l = \mathbf{a}_l);
\end{aligned}$$

- For the case of  $(x_l, c_l) = (0, 1)$ , we have

$$\begin{aligned}
& \mathbb{P}(C_l = c_l \mid \mathbf{A}_k = \mathbf{a}_k) \\
&= \mathbb{P}\left((X_l)_{\mathbf{a}_l} = 0, (X_l)_{\mathbf{a}_k, \mathbf{c}_{k:l-1}, \mathbf{x}_S^1} = 1 \mid \mathbf{A}_k = \mathbf{a}_k\right) \\
&= \mathbb{P}\left((X_l)_{\mathbf{a}_l} = 0 \mid \mathbf{A}_k = \mathbf{a}_k\right) - \mathbb{P}\left((X_l)_{\mathbf{a}_l} = 0, (X_l)_{\mathbf{a}_k, \mathbf{c}_{k:l-1}, \mathbf{x}_S^1} = 0 \mid \mathbf{A}_k = \mathbf{a}_k\right) \\
&= \mathbb{P}(X_l = 0 \mid \mathbf{A}_l = \mathbf{a}_l) - \mathbb{P}(X_l = 0 \mid \mathbf{A}_k = \mathbf{a}_k, \mathbf{X}_{k:l-1} = \mathbf{c}_{k+l-1}).
\end{aligned}$$

Summarizing the identification equations for the three cases, we get

$$\begin{aligned}
& \prod_{l=k}^p \mathbb{P}(C_l = c_l \mid \mathbf{A}_k = \mathbf{a}_k) \\
&= 1_{\mathbf{x}_S = \mathbf{c}_S} \times \prod_{i \in \{k, \dots, p\} \setminus \mathbf{S}} \left\{ (1 - x_i)c_i \times \mathbb{P}(X_i = 0 \mid \mathbf{A}_i = \mathbf{a}_i) + x_i \times \mathbb{P}(X_i = 1 \mid \mathbf{A}_i = \mathbf{a}_i) \right. \\
& \quad \left. + (1 - x_i)(-1)^{c_i} \times \mathbb{P}(X_i = 0 \mid \mathbf{A}_k = \mathbf{a}_k, \mathbf{X}_{k:i-1} = \mathbf{c}_{k:i-1}) \right\} \times \prod_{i \in \mathbf{S}} \mathbb{P}(X_i = x_i \mid \mathbf{A}_i = \mathbf{a}_i).
\end{aligned}$$

From the above results, the identification formula of  $P(Y_{\mathbf{x}_S^1} = 1 \mid \mathbf{X} = \mathbf{x})$  can be derived as follows

$$\begin{aligned}
P(Y_{\mathbf{x}_S^1} = 1 \mid \mathbf{X} = \mathbf{x}) &= \frac{P(Y_{\mathbf{x}_S^1} = 1, \mathbf{X} = \mathbf{x})}{P(\mathbf{X} = \mathbf{x})} \\
&= \sum_{\mathbf{c}_{k:p} \succeq \mathbf{d}_k} \left[ \frac{P(Y_{\mathbf{a}_k, \mathbf{c}_{k:p}} = 1 \mid \mathbf{A}_k = \mathbf{a}_k)}{P(\mathbf{D}_k = \mathbf{d}_k \mid \mathbf{A}_k = \mathbf{a}_k)} \times \prod_{l=k}^p P(C_l = c_l \mid \mathbf{A}_k = \mathbf{a}_k) \right] \\
&= \sum_{\mathbf{c}_{k:p} \succeq \mathbf{d}_k} \left\{ 1_{\mathbf{x}_S = \mathbf{c}_S} \times \frac{P(Y = 1 \mid \mathbf{A}_k = \mathbf{a}_k, \mathbf{D}_k = \mathbf{c}_{k:p})}{P(\mathbf{D}_k = \mathbf{d}_k \mid \mathbf{A}_k = \mathbf{a}_k)} \times \prod_{i \in S} P(X_i = x_i \mid \mathbf{A}_i = \mathbf{a}_i) \right. \\
&\quad \times \prod_{i \in \{k, \dots, p\} \setminus S} \left[ (1 - x_i)c_i \times P(X_i = 0 \mid \mathbf{A}_i = \mathbf{a}_i) + x_i \times P(X_i = 1 \mid \mathbf{A}_i = \mathbf{a}_i) \right. \\
&\quad \left. \left. + (1 - x_i)(-1)^{c_i} \times P(X_i = 0 \mid \mathbf{A}_k = \mathbf{a}_k, \mathbf{X}_{k:i-1} = \mathbf{c}_{k:i-1}) \right] \right\} \\
&= \sum_{\mathbf{c}_{k:p} \succeq \mathbf{d}_k} \left\{ 1_{\mathbf{x}_S = \mathbf{c}_S} \times P(Y = 1 \mid \mathbf{A}_k = \mathbf{a}_k, \mathbf{D}_k = \mathbf{c}_{k:p}) \right. \\
&\quad \left. \times \prod_{i \in \{k, \dots, p\} \setminus S} \left[ x_i + c_i - x_i c_i + (1 - x_i)(-1)^{c_i} \times \frac{P(X_i = 0 \mid \mathbf{A}_k = \mathbf{a}_k, \mathbf{X}_{k:i-1} = \mathbf{c}_{k:i-1})}{P(X_i = x_i \mid \mathbf{A}_i = \mathbf{a}_i)} \right] \right\},
\end{aligned}$$

where the last equality holds because

$$(1 - x_i)c_i \times \frac{P(X_i = 0 \mid \mathbf{A}_i = \mathbf{a}_i)}{P(X_i = x_i \mid \mathbf{A}_i = \mathbf{a}_i)} = \begin{cases} 0, & \text{if } x_i = 1; \\ (1 - x_i)c_i, & \text{if } x_i = 0; \end{cases}$$

and

$$x_i \times \frac{P(X_i = 1 \mid \mathbf{A}_i = \mathbf{a}_i)}{P(X_i = x_i \mid \mathbf{A}_i = \mathbf{a}_i)} = \begin{cases} x_i, & \text{if } x_i = 1; \\ 0, & \text{if } x_i = 0. \end{cases}$$

## C PROOF OF THEOREM 1

The conclusion follows directly from Lemma 1, Lemma 2 and the definition of CCCE.

## D PROOF OF COROLLARY 1

For any subset  $\mathbf{X}' \subseteq \mathbf{X}$ , we have

$$\begin{aligned}
&\text{CCCE}(\mathbf{X}_S \Rightarrow Y \mid \mathbf{X}' = \mathbf{x}') \\
&= P(Y_{\mathbf{x}_S^1} = 1 \mid \mathbf{X}' = \mathbf{x}') - P(Y_{\mathbf{x}_S^0} = 1 \mid \mathbf{X}' = \mathbf{x}') \\
&= \sum_{\mathbf{x}: \mathbf{x} \supseteq \mathbf{x}'} \left[ P(Y_{\mathbf{x}_S^1} = 1 \mid \mathbf{X} = \mathbf{x}) - P(Y_{\mathbf{x}_S^0} = 1 \mid \mathbf{X} = \mathbf{x}) \right] \times P(\mathbf{X} = \mathbf{x} \mid \mathbf{X}' = \mathbf{x}') \\
&= \sum_{\mathbf{x}: \mathbf{x} \supseteq \mathbf{x}'} \text{CCCE}(\mathbf{X}_S \Rightarrow Y \mid \mathbf{X} = \mathbf{x}) \times P(\mathbf{X} = \mathbf{x} \mid \mathbf{X}' = \mathbf{x}').
\end{aligned}$$

Hence,  $\text{CCCE}(\mathbf{X}_S \Rightarrow Y \mid \mathbf{X}' = \mathbf{x}')$  is identifiable if and only if  $\text{CCCE}(\mathbf{X}_S \Rightarrow Y \mid \mathbf{X} = \mathbf{x})$  is identifiable, and its identification formula can be obtained by Theorem 1.

## E PROOF OF THEOREM 2

### E.1 CCCE( $\mathbf{X}_S \Rightarrow Y \mid \mathbf{X} = \mathbf{x}, Y = 1$ )

For  $Y = 1$ , we have

$$\begin{aligned} \text{CCCE}(\mathbf{X}_S \Rightarrow Y \mid \mathbf{X} = \mathbf{x}, Y = 1) &= E(Y_{\mathbf{x}_S^1} - Y_{\mathbf{x}_S^0} \mid \mathbf{X} = \mathbf{x}, Y = 1) \\ &= 1 - P(Y_{\mathbf{x}_S^0} = 1 \mid \mathbf{X} = \mathbf{x}, Y = 1) = 1 - \frac{P(Y_{\mathbf{x}_S^0} = 1, \mathbf{X} = \mathbf{x}, Y = 1)}{P(\mathbf{X} = \mathbf{x}, Y = 1)}. \end{aligned}$$

By consistency, composition and Assumption 2(a), we have

$$\begin{aligned} &P(Y_{\mathbf{x}_S^0} = 1, \mathbf{X} = \mathbf{x}, Y = 1) \\ &= \sum_{\mathbf{c}_k \preceq \mathbf{d}_k} P(Y_{\mathbf{x}_S^0} = 1, Y_{\mathbf{x}} = 1, (\mathbf{A}_k)_{\mathbf{x}_S^0} = \mathbf{a}_k, (\mathbf{D}_k)_{\mathbf{a}_k, \mathbf{x}_S^0} = \mathbf{c}_k, \mathbf{X} = \mathbf{x}) \\ &= \sum_{\mathbf{c}_k \preceq \mathbf{d}_k} P(Y_{\mathbf{a}_k, \mathbf{x}_S^0, \mathbf{c}_k} = 1, Y_{\mathbf{x}} = 1, (\mathbf{A}_k)_{\mathbf{x}_S^0} = \mathbf{a}_k, (\mathbf{D}_k)_{\mathbf{a}_k, \mathbf{x}_S^0} = \mathbf{c}_k, \mathbf{X} = \mathbf{x}) \\ &= \sum_{\mathbf{c}_k \preceq \mathbf{d}_k} P(Y_{\mathbf{a}_k, \mathbf{x}_S^0, \mathbf{c}_k} = 1, (\mathbf{A}_k)_{\mathbf{x}_S^0} = \mathbf{a}_k, (\mathbf{D}_k)_{\mathbf{a}_k, \mathbf{x}_S^0} = \mathbf{c}_k, \mathbf{X} = \mathbf{x}) \\ &= \sum_{\mathbf{c}_k \preceq \mathbf{d}_k} P(Y_{\mathbf{x}_S^0} = 1, (\mathbf{D}_k)_{\mathbf{a}_k, \mathbf{x}_S^0} = \mathbf{c}_k, \mathbf{X} = \mathbf{x}) \\ &= P(Y_{\mathbf{x}_S^0} = 1, \mathbf{X} = \mathbf{x}), \end{aligned}$$

where  $k = \min \mathbf{S}$ . Hence, we have

$$\begin{aligned} \text{CCCE}(\mathbf{X}_S \Rightarrow Y \mid \mathbf{X} = \mathbf{x}, Y = 1) &= 1 - \frac{P(Y_{\mathbf{x}_S^0} = 1, \mathbf{X} = \mathbf{x}, Y = 1)}{P(\mathbf{X} = \mathbf{x}, Y = 1)} \\ &= 1 - \frac{P(Y_{\mathbf{x}_S^0} = 1, \mathbf{X} = \mathbf{x})}{P(\mathbf{X} = \mathbf{x}, Y = 1)} = 1 - \frac{P(Y_{\mathbf{x}_S^0} = 1 \mid \mathbf{X} = \mathbf{x})}{P(Y = 1 \mid \mathbf{X} = \mathbf{x})}. \end{aligned}$$

### E.2 CCCE( $\mathbf{X}_S \Rightarrow Y \mid \mathbf{X} = \mathbf{x}, Y = 0$ )

For  $Y = 0$ , we have

$$\begin{aligned} \text{CCCE}(\mathbf{X}_S \Rightarrow Y \mid \mathbf{X} = \mathbf{x}, Y = 0) &= E(Y_{\mathbf{x}_S^1} - Y_{\mathbf{x}_S^0} \mid \mathbf{X} = \mathbf{x}, Y = 0) \\ &= P(Y_{\mathbf{x}_S^1} = 1 \mid \mathbf{X} = \mathbf{x}, Y = 0) - 0 = 1 - P(Y_{\mathbf{x}_S^1} = 0 \mid \mathbf{X} = \mathbf{x}, Y = 0) \\ &= 1 - \frac{P(Y_{\mathbf{x}_S^1} = 0, \mathbf{X} = \mathbf{x}, Y = 0)}{P(\mathbf{X} = \mathbf{x}, Y = 0)}. \end{aligned}$$

By consistency, composition and Assumption 2(a), we have

$$\begin{aligned} &P(Y_{\mathbf{x}_S^1} = 0, \mathbf{X} = \mathbf{x}, Y = 0) \\ &= \sum_{\mathbf{c}_k \succeq \mathbf{d}_k} P(Y_{\mathbf{x}_S^1} = 0, Y_{\mathbf{x}} = 0, (\mathbf{A}_k)_{\mathbf{x}_S^1} = \mathbf{a}_k, (\mathbf{D}_k)_{\mathbf{a}_k, \mathbf{x}_S^1} = \mathbf{c}_k, \mathbf{X} = \mathbf{x}) \\ &= \sum_{\mathbf{c}_k \succeq \mathbf{d}_k} P(Y_{\mathbf{a}_k, \mathbf{x}_S^1, \mathbf{c}_k} = 0, Y_{\mathbf{x}} = 0, (\mathbf{A}_k)_{\mathbf{x}_S^1} = \mathbf{a}_k, (\mathbf{D}_k)_{\mathbf{a}_k, \mathbf{x}_S^1} = \mathbf{c}_k, \mathbf{X} = \mathbf{x}) \\ &= \sum_{\mathbf{c}_k \succeq \mathbf{d}_k} P(Y_{\mathbf{a}_k, \mathbf{x}_S^1, \mathbf{c}_k} = 0, (\mathbf{A}_k)_{\mathbf{x}_S^1} = \mathbf{a}_k, (\mathbf{D}_k)_{\mathbf{a}_k, \mathbf{x}_S^1} = \mathbf{c}_k, \mathbf{X} = \mathbf{x}) \\ &= \sum_{\mathbf{c}_k \succeq \mathbf{d}_k} P(Y_{\mathbf{x}_S^1} = 0, (\mathbf{D}_k)_{\mathbf{a}_k, \mathbf{x}_S^1} = \mathbf{c}_k, \mathbf{X} = \mathbf{x}) \\ &= P(Y_{\mathbf{x}_S^1} = 0, \mathbf{X} = \mathbf{x}), \end{aligned}$$

where  $k = \min \mathbf{S}$ . Hence, we have

$$\begin{aligned} \text{CCCE}(\mathbf{X}_{\mathbf{S}} \Rightarrow Y \mid \mathbf{X} = \mathbf{x}, Y = 0) &= 1 - \frac{\text{P}(Y_{\mathbf{x}_{\mathbf{S}}^1} = 0, \mathbf{X} = \mathbf{x}, Y = 0)}{\text{P}(\mathbf{X} = \mathbf{x}, Y = 0)} \\ &= 1 - \frac{\text{P}(Y_{\mathbf{x}_{\mathbf{S}}^1} = 0, \mathbf{X} = \mathbf{x})}{\text{P}(\mathbf{X} = \mathbf{x}, Y = 0)} = 1 - \frac{\text{P}(Y_{\mathbf{x}_{\mathbf{S}}^1} = 0 \mid \mathbf{X} = \mathbf{x})}{\text{P}(Y = 0 \mid \mathbf{X} = \mathbf{x})}. \end{aligned}$$

## F PROOF OF LEMMA 3

Using the notations in this lemma, we have

$$\begin{aligned} &\text{P}(Y_{\mathbf{x}_{\mathbf{S}}^*} = 1, \mathbf{X} = \mathbf{x}, Y = y, \mathbf{Z} = \mathbf{z}) \\ &= \sum_{\mathbf{x}^*} \text{P}(Y_{\mathbf{x}_{\mathbf{S}}^*} = 1, \mathbf{X}_{\mathbf{x}_{\mathbf{S}}^*} = \mathbf{x}^*, \mathbf{X} = \mathbf{x}, Y = y, \mathbf{Z} = \mathbf{z}) \\ &= \sum_{\mathbf{x}^*} \text{P}(Y_{\mathbf{x}^*} = 1, \mathbf{X}_{\mathbf{x}_{\mathbf{S}}^*} = \mathbf{x}^*, \mathbf{X} = \mathbf{x}, Y = y, \mathbf{Z} = \mathbf{z}) \\ &= \sum_{\mathbf{x}^*} \text{P}(Y_{\mathbf{x}^*} = 1, \mathbf{X}_{\mathbf{x}_{\mathbf{S}}^*} = \mathbf{x}^*, \mathbf{Z} = \mathbf{z} \mid \mathbf{X} = \mathbf{x}, Y = y) \times \text{P}(\mathbf{X} = \mathbf{x}, Y = y) \\ &= \sum_{\mathbf{x}^*} \text{P}(Y_{\mathbf{x}^*} = 1, \mathbf{X}_{\mathbf{x}_{\mathbf{S}}^*} = \mathbf{x}^* \mid \mathbf{X} = \mathbf{x}, Y = y) \times \text{P}(\mathbf{Z} = \mathbf{z} \mid \mathbf{X} = \mathbf{x}, Y = y) \times \text{P}(\mathbf{X} = \mathbf{x}, Y = y) \\ &= \sum_{\mathbf{x}^*} \text{P}(Y_{\mathbf{x}^*} = 1, \mathbf{X}_{\mathbf{x}_{\mathbf{S}}^*} = \mathbf{x}^* \mid \mathbf{X} = \mathbf{x}, Y = y) \times \text{P}(\mathbf{X} = \mathbf{x}, Y = y, \mathbf{Z} = \mathbf{z}), \end{aligned}$$

where the second and the fourth equalities hold because of the composition and Assumption 1(c), respectively. Hence, we have

$$\begin{aligned} &\text{P}(Y_{\mathbf{x}_{\mathbf{S}}^*} = 1 \mid \mathbf{X} = \mathbf{x}, Y = y, \mathbf{Z} = \mathbf{z}) = \frac{\text{P}(Y_{\mathbf{x}_{\mathbf{S}}^*} = 1, \mathbf{X} = \mathbf{x}, Y = y, \mathbf{Z} = \mathbf{z})}{\text{P}(\mathbf{X} = \mathbf{x}, Y = y, \mathbf{Z} = \mathbf{z})} \\ &= \sum_{\mathbf{x}^*} \text{P}(Y_{\mathbf{x}^*} = 1, \mathbf{X}_{\mathbf{x}_{\mathbf{S}}^*} = \mathbf{x}^* \mid \mathbf{X} = \mathbf{x}, Y = y) \\ &= \text{P}(Y_{\mathbf{x}_{\mathbf{S}}^*} = 1 \mid \mathbf{X} = \mathbf{x}, Y = y). \end{aligned}$$

## G PROOF OF COROLLARY 3

The conclusion follows directly from Lemma 3 and the definition of CCCE.

## H PROOF OF THEOREM 3

For any subset  $\mathbf{W} \subseteq (\mathbf{X}, Y, \mathbf{Z})$ , we have

$$\begin{aligned} &\text{CCCE}(\mathbf{X}_{\mathbf{S}} \Rightarrow Y \mid \mathbf{W} = \mathbf{w}) \\ &= \text{P}(Y_{\mathbf{x}_{\mathbf{S}}^1} = 1 \mid \mathbf{W} = \mathbf{w}) - \text{P}(Y_{\mathbf{x}_{\mathbf{S}}^0} = 1 \mid \mathbf{W} = \mathbf{w}) \\ &= \sum_{(\mathbf{x}, y, \mathbf{z}) : (\mathbf{x}, y, \mathbf{z}) \supseteq \mathbf{w}} \text{P}(\mathbf{X} = \mathbf{x}, Y = y, \mathbf{Z} = \mathbf{z} \mid \mathbf{W}) \times \left[ \text{P}(Y_{\mathbf{x}_{\mathbf{S}}^1} = 1 \mid \mathbf{X} = \mathbf{x}, Y = y, \mathbf{Z} = \mathbf{z}) \right. \\ &\quad \left. - \text{P}(Y_{\mathbf{x}_{\mathbf{S}}^0} = 1 \mid \mathbf{X} = \mathbf{x}, Y = y, \mathbf{Z} = \mathbf{z}) \right] \\ &= \sum_{(\mathbf{x}, y, \mathbf{z}) : (\mathbf{x}, y, \mathbf{z}) \supseteq \mathbf{w}} \text{CCCE}(\mathbf{X}_{\mathbf{S}} \Rightarrow Y \mid \mathbf{X} = \mathbf{x}, Y = y, \mathbf{Z} = \mathbf{z}) \times \text{P}(\mathbf{X} = \mathbf{x}, Y = y, \mathbf{Z} = \mathbf{z} \mid \mathbf{W}) \\ &= \sum_{(\mathbf{x}, y, \mathbf{z}) : (\mathbf{x}, y, \mathbf{z}) \supseteq \mathbf{w}} \text{CCCE}(\mathbf{X}_{\mathbf{S}} \Rightarrow Y \mid \mathbf{X} = \mathbf{x}, Y = y) \times \text{P}(\mathbf{X} = \mathbf{x}, Y = y, \mathbf{Z} = \mathbf{z} \mid \mathbf{W}), \end{aligned}$$

where the last equality holds because of Corollary 3. Hence,  $\text{CCCE}(\mathbf{X}_{\mathbf{S}} \Rightarrow Y \mid \mathbf{W} = \mathbf{w})$  is identifiable if and only if  $\text{CCCE}(\mathbf{X}_{\mathbf{S}} \Rightarrow Y \mid \mathbf{X} = \mathbf{x}, Y = y)$  is identifiable for any  $(\mathbf{x}, y, \mathbf{z}) \supseteq \mathbf{w}$ , and under Assumption 1 and Assumption 2, the identification equations are given by Theorem 2.
